# Characterization of the Complete Mitochondrion Genome of Diurnal Moth *Amata emma* (Butler) (Lepidoptera: Erebidae) and Its Phylogenetic Implications

Hui-Fen Lu<sup>1,2</sup>, Tian-Juan Su<sup>1</sup>, A-Rong Luo<sup>1</sup>, Chao-Dong Zhu<sup>1\*</sup>, Chun-Sheng Wu<sup>1\*</sup>

**1** Key Laboratory of Zoological Systematics and Evolution, Institute of Zoology, Chinese Academy of Sciences, Beijing, China, **2** University of Chinese Academy of Sciences, Beijing, China

## Abstract

Mitogenomes can provide information for phylogenetic analyses and evolutionary biology. The complete mitochondrial genome of *Amata emma* (Lepidoptera: Erebidae) was sequenced and analyzed in the study. The circular genome is 15,463 bp in size, with the gene content, orientation and order identical to other ditrysian insects. The genome composition of the major strand shows highly A+T biased and exhibits negative AT-skew and GC-skew. The initial codons are the canonical putative start codons ATN with the exception of *cox1* gene which uses CGA instead. Ten genes share complete termination codons TAA, and three genes use incomplete stop codons TA or T. Additionally, the codon distribution and Relative Synonymous Codon Usage of the 13 PCGs in the *A. emma* mitogenome are consistent with those in other Noctuid mitogenomes. All tRNA genes have typical cloverleaf secondary structures, except for the *trnS1* (AGN) gene, in which the dihydrouridine (DHU) arm is simplified down to a loop. The secondary structures of two rRNA genes broadly conform with the models proposed for these genes of other Lepidopteran insects. Except for the A+T-rich region, there are three major intergenic spacers, spanning at least 10 bp and five overlapping regions. There are obvious differences in the A+T-rich region between *A. emma* and other Lepidopteran insects reported previously except that the A+T-rich region contains an 'ATAGA'-like motif followed by a 19 bp poly-T stretch and a (AT)<sub>9</sub> element preceded by the 'ATTTA' motif. It neither has a poly-A (in the  $\alpha$  strand) upstream *trnM* nor potential stem-loop structures and just has some simple structures like (AT)<sub>n</sub>GTAT. The phylogenetic relationships based on nucleotide sequences of 13 PCGs using Bayesian inference and maximum likelihood methods provided a well-supported a broader outline of Lepidoptera and which agree with the traditional morphological classification and recently working, but with a much higher support.

**Citation:** Lu H-F, Su T-J, Luo A-R, Zhu C-D, Wu C-S (2013) Characterization of the Complete Mitochondrion Genome of Diurnal Moth *Amata emma* (Butler) (Lepidoptera: Erebidae) and Its Phylogenetic Implications. PLoS ONE 8(9): e72410. doi:10.1371/journal.pone.0072410

**Editor:** Vladimir N. Uversky, University of South Florida College of Medicine, United States of America

**Received:** December 6, 2012; **Accepted:** July 14, 2013; **Published:** September 12, 2013

**Copyright:** © 2013 Lu et al. This is an open-access article distributed under the terms of the Creative Commons Attribution License, which permits unrestricted use, distribution, and reproduction in any medium, provided the original author and source are credited.

**Funding:** This work was supported mainly by the Knowledge Innovation Program of the Chinese Academy of Sciences (grant no. KSCX2-EW-B-02), partially by the Public Welfare Project from the Ministry of Agriculture, China (grant no. 201103024); grants from National Science Foundation, China (grants 30870268, 31172048, J0930004) to Chao-Dong ZHU, and one grant (31172129) to Chun-Sheng Wu. The funders had no role in study design, data collection and analysis, decision to publish, or preparation of the manuscript.

**Competing Interests:** The authors have declared that no competing interests exist.

\* E-mail: zhucd@ioz.ac.cn (CDZ); wucs@ioz.ac.cn (CSW)

## Introduction

The ancestral insect mitogenome is a closed-circular DNA molecule, spanning 16–20 kilobases (kb) [1], containing 13 protein-coding genes (PCGs), two ribosomal RNA genes (rRNAs), and 22 transfer RNA genes (tRNAs). It also has a control region (A+T-rich region) of highly variable length, which regulates the transcription and replication of the genome [2]. Twenty three genes are coded on the majority strand while the rest are coded on the minority strand. Because of the characteristics of small size, maternal inheritance, relatively rapid evolutionary rate, lack of introns and genetic recombination, the mitochondrial DNA (mtDNA) has been widely used in studies on molecular evolution, molecular phylogenetics and population genetics [3–5]. Mitochondrial genomes (mtgenomes) are very important subject for different scientific disciplines including animal health, comparative

and evolutionary genomics, molecular evolution, phylogenetic and population genetics [3].

Lepidoptera (moths and butterflies) is the second largest order in Insecta, containing over 155 000 described species [6,7]. In Lepidoptera, Noctuoidea is the largest superfamily with about 42,400 species worldwide [7,8]. Despite such huge taxonomic diversity the existing mtgenome information on Noctuoidea is very limited. To date, only 7 species have mtgenomes publicly available in GenBank. Erebidae was upgraded to family from Erebiniae [9] within Noctuoidea and newly revised by Zahiri *et al.* [10]. Moreover, current genomic knowledge of which is even scantier which is limited to 3 species belonging to 2 subfamilies among 18 known. A better understanding of Noctuoidea or Erebidae all deeply requires an expansion of taxon and genome samplings using which to get datasets for a strong phylogenetic signal. Zahiri *et al.* (2011) proposed a newly robust phylogenetic framework of Noctuoidea with six families: Oenosandridae, Notodontidae,

**Table 1.** Regions and primers in present paper.

| Fragment (Region) | Primer (F/R)      | Primer sequence (F/R) 5'→3' |                                                      |
|-------------------|-------------------|-----------------------------|------------------------------------------------------|
| F1                | <i>nad2-cox1</i>  | Nad2-J-416/cox1-N-1693      | TTTACCCTCAACTGAAGCCTCT/TACTAATCAGTTACCAATCTCTCA      |
| F2                | <i>cox1</i>       | Lco1490/Hco2198             | GGTCAACAAATCATAAAGATATTGG/TAAACTTCAGGGTGACCAAAAAATCA |
| F3                | <i>cox1-trnL2</i> | C1-J-1751/TL2-N-3014        | GGATCACCTGATATAGCATTCCC/TCCAATGCACATAATCTGCCATATTA   |
| F4                | <i>cox1-cox2</i>  | C1-J-2797/C2-N-3494         | CCTCGACGTTATTAGATTACC/GGTAAACTACTCGATTATCAAC         |
| F5                | <i>cox2-trnD</i>  | C2-J-3400/A8-N-3914         | ATTGGACATCAATGATATTGA/TCATCTTATAGTACTATTTGAGG        |
| F6                | <i>cox2-nad4</i>  | C2-J-3696/N4-N-8484         | GAAATTTGTGGAGCAAATCATAG/GCTAATATAGCAGCTCTCC          |
| F7                | <i>nad5-nad4</i>  | Nad5-J-7745/nad4-N-8820     | TAAACCTAACCCATCTCACCCC/GGTTATGGGCTTTTACGATT          |
| F8                | <i>nad4</i>       | Nad4-J-8569/nad4-N-9105     | GCTAAACAAAATATCCCCGATGAAC/GTATCAGCCTGAGCGAATTAAGCA   |
| F9                | <i>nad4-cob</i>   | Nad4-J-8887/cob-N-11326     | GGAGCTTCAACATGAGCTTT/GCATAAGCAAATAAGAAATATCATT       |
| F10               | <i>cob-nad1</i>   | CB-J-10933/N1-N-12595       | TATGACTACCATGAGGACAAATATC/GTAGCATTTTAACTTTATTAGAACG  |
| F11               | <i>nad1-rrnL</i>  | N1-J-12585/LR-N-13398       | GGTCCCTTACGAATTTGAATATATCCT/CGCCTGTTTAAACAAAACAT     |
| F12               | <i>rrnL-rrnS</i>  | LR-J-12887/SR-N-14588       | CCGGTCTGAACCTCAGATACGT/AACTAGGATTAGATACCTATTAT       |
| F13               | <i>rrnL-rrnS</i>  | LR-J-13331/SR-N-14756       | TGATTATGCTACCTTTCACAGT/GACAAAATTCGTGCCAGCAGT         |
| F14               | <i>rrnS-nad2</i>  | SR-J-14612/N2-N-732         | AGGGTATCTAATCCTAGTTT/GAAGTTTGGTTTAAACCTCC            |

doi:10.1371/journal.pone.0072410.t001

Erebidae, Euteliidae, Nolidae and Noctuidae, in which the relationship of Erebidae only a few lineages are well supported [11].

Ctenuchinina (Lepidoptera: Noctuoidea: Erebidae: Arctiinae) consists of four subtribes in two tribes: Syntomini and Thyretina in Syntomini as well as Euchromiina and Ctenuchina in Arctiini [9,10,11], which was formerly treated as an independent family named Ctenuchidae (= Syntomidae, Euchromidae, Amatidae) (e.g. [12]). It is not a monophyletic group. Ctenuchinina contains a large number of diurnal moths which are phytophagous pests in agriculture and forest since the larvae and adults have massive economic impact on crop production and forest protection. *Cissepis fulvicollis*, for instance, has been recorded as an economic destructive insect on grain corn [13]. Hence, the resolution of a stable classificatory structure for the major lineages of these moths, and understanding their phylogenetic relationships, are meaningful to biological prevention and control.

Ctenuchinina was confused with the species of Zygaenidae and Sesidae in the history, and fell into Sphingidae or Zygaenidae in early research. Herrich-Schäffer clearly separated this group from Zygaenidae and treated it as a family based on the type genus of *Syntomis* Ochsenheimer, 1808 which was the synonym of *Amata* Fabricius, 1807. The classification relationships of Ctenuchinina is based on the presences of a metepisternal tymbal organ, genitalic

character, larvae and venation which failed to offer a clear conclusion since crossing synapomorphy is always inevitable existence. As the intricate relationship among itself as well as with close related groups, the classification status of Ctenuchinina presents long-term, constantly change. Aim to figure out some divergence in the morphological taxonomy, molecular characters were introduced to perform taxonomic studies of Ctenuchinina. But these studies are still very scant and were restricted to several molecular markers. Wink *et al.* used 16S rRNA sequences to construct phylogenetic relationships, in which Ctenuchidae was downgraded to subfamily status within Arctiidae [14]. Schneider *et al.* proposed a split of the genus *Amata* in two distinct genera based on mitochondrial 16S rRNA gene [15]. Therefore seeking more approach and genetic markers to solve these problems is become necessary effort.

In addition, the available gene knowledge of Ctenuchinina is limited and narrow as well exemplified by sequences available in GenBank that were obtained mostly cytochrome oxidase subunit 1 (COI) genes. There are more than 2800 sequences with about 2659 (accounting for about 94.19%) are COI genes of very short length of 600–700 bp, and the remains are a handful of mRNA (about 6) and other sequences without any mtgenome. Undoubtedly, these nucleotide information is extremely limited relative to

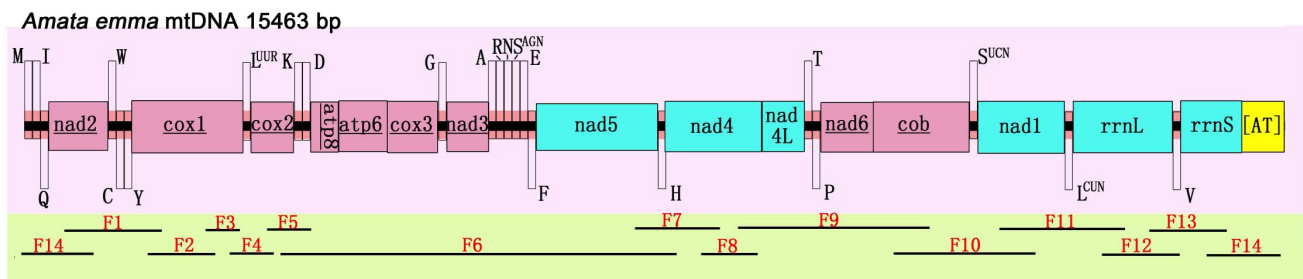

**Figure 1. Map of the mitochondrial genome of *A. emma*.** Protein-coding genes (names with underlines) coded on the majority strand are pink colored, while the rest and two rRNA genes coded on the minority strand are blue colored. The tRNA genes with single letter above the central axis are coded on majority strand. Underscores under the axis with F1–F14 indicate positions of 14 overlapping PCR amplified fragments.

doi:10.1371/journal.pone.0072410.g001

**Table 2.** List of taxa analyzed in present paper.

| Subfamily                       | Family                                | Species                     | Length                          | Acc.number | Reference                    |
|---------------------------------|---------------------------------------|-----------------------------|---------------------------------|------------|------------------------------|
| Bombycoidea                     | Bombycidae                            | <i>Bombyx mori</i>          | 15,643 bp                       | NC_002355  | Lee et al., unpublished      |
|                                 |                                       | <i>Bombyx mandarina</i>     | 15,928 bp                       | NC_003395  | [46]                         |
|                                 | Saturniidae                           | <i>Antheraea pernyi</i>     | 15,566 bp                       | NC_004622  | [47]                         |
|                                 |                                       | <i>Antheraea yamamai</i>    | 15,338 bp                       | NC_012739  | [48]                         |
|                                 |                                       | <i>Samia cynthia ricini</i> | 15,384 bp                       | NC_017869  | [49]                         |
|                                 |                                       | <i>Saturnia boisduvalii</i> | 15,360 bp                       | NC_010613  | [50]                         |
|                                 |                                       | <i>Eriogyna pyretorum</i>   | 15,327 bp                       | NC_012727  | [51]                         |
|                                 |                                       | <i>Actias selene</i>        | 15,236 bp                       | NC_018133  | [52]                         |
|                                 | Sphingidae                            | <i>Manduca sexta</i>        | 15,516 bp                       | NC_010266  | [31]                         |
|                                 | Geometroidea                          | Geometridae                 | <i>Phthonandria atrilineata</i> | 15,499 bp  | NC_010522                    |
| Noctuoidea                      | Noctodontidae                         | <i>Phalera flavescens</i>   | 15,659 bp                       | NC_016067  | [54]                         |
|                                 |                                       | <i>Ochrogaster lunifer</i>  | 15,593 bp                       | NC_011128  | [3]                          |
|                                 | Erebidae                              | <i>Lymantria dispar</i>     | 15,569 bp                       | NC_012893  | [55]                         |
|                                 |                                       | <i>Hyphantria cunea</i>     | 15,481 bp                       | NC_014058  | [42]                         |
|                                 |                                       | <b><i>Amata emma</i></b>    | 15,463 bp                       | KC_513737  | The present study            |
|                                 | Noctuidae                             | <i>Helicoverpa armigera</i> | 15,347 bp                       | NC_014668  | [43]                         |
|                                 |                                       | <i>Sesamia inferens</i>     | 15,413 bp                       | NC_015835  | Chai et al., unpublished     |
|                                 | Pyraloidea                            | Crambidae                   | <i>Ostrinia nubilalis</i>       | 14,535 bp  | NC_003367                    |
| <i>Diatraea saccharalis</i>     |                                       |                             | 15,490 bp                       | NC_013274  | [57]                         |
| <i>Ostrinia furnacalis</i>      |                                       |                             | 14,536 bp                       | NC_003368  | [56]                         |
| <i>Chilo suppressalis</i>       |                                       |                             | 15,395 bp                       | NC_015612  | [35]                         |
| <i>Cnaphalocrocis medinalis</i> |                                       |                             | 15,388 bp                       | NC_015985  | [35]                         |
| Pyralidae                       |                                       | <i>Corcyra cephalonica</i>  | 15,273 bp                       | NC_016866  | Wu et al., unpublished       |
| Tortricoidea                    |                                       | Tortricidae                 | <i>Adoxophyes honmai</i>        | 15,680 bp  | NC_008141                    |
|                                 | <i>Grapholita molesta</i>             |                             | 15,717 bp                       | NC_014806  | [58]                         |
|                                 | <i>Spilonota lechriaspis</i>          |                             | 15,368 bp                       | NC_014294  | [41]                         |
| Papilionoidea                   | Papilionidae                          | <i>Papilio machaon</i>      | 15,185 bp                       | NC_018047  | Xu et al., unpublished       |
|                                 |                                       | <i>Papilio bianor</i>       | 15,340 bp                       | NC_018040  | Xu et al., unpublished       |
|                                 |                                       | <i>Teinopalpus aureus</i>   | 15,242 bp                       | NC_014398  | [59]                         |
|                                 |                                       | <i>Parnassius bremeri</i>   | 15,389 bp                       | NC_014053  | [60]                         |
|                                 |                                       | <i>Papilio maraho</i>       | 16,094 bp                       | NC_014055  | Wu et al., unpublished       |
|                                 |                                       | Nymphalidae                 | <i>Euploea mulciber</i>         | 15,166 bp  | NC_016720                    |
|                                 | <i>Libythea celtis</i>                |                             | 15,164 bp                       | NC_016724  | [61]                         |
|                                 | <i>Melitaea cinxia</i>                |                             | 15,170 bp                       | NC_018029  | Xu et al., unpublished       |
|                                 | <i>Issoria lathonia</i>               |                             | 15,172 bp                       | NC_018030  | Xu et al., unpublished       |
|                                 | <i>Kallima inachus</i>                |                             | 15,183 bp                       | NC_016196  | [62]                         |
|                                 | <i>Acraea issoria</i>                 |                             | 15,245 bp                       | NC_013604  | [63]                         |
|                                 | <i>Argynnis hyperbius</i>             |                             | 15,156 bp                       | NC_015988  | [64]                         |
|                                 | <i>Apatura ilia</i>                   |                             | 15,242 bp                       | NC_016062  | [65]                         |
|                                 | <i>Sasakia charonda</i>               |                             | 15,244 bp                       | NC_014224  | Hakozaki et al., unpublished |
|                                 | <i>Hipparchia autonoe</i>             |                             | 15,489 bp                       | NC_014587  | [66]                         |
|                                 | <i>Apatura metis</i>                  |                             | 15,236 bp                       | NC_015537  | [67]                         |
|                                 | <i>Sasakia charonda kuriyamaensis</i> |                             | 15,222 bp                       | NC_014223  | Hakozaki et al., unpublished |
|                                 | <i>Athyma sulphitia</i>               |                             | 15,268 bp                       | NC_017744  | [68]                         |
|                                 | <i>Calinaga davidis</i>               |                             | 15,267 bp                       | NC_015480  | [69]                         |
|                                 | Pieridae                              | <i>Fabriciana nerippe</i>   | 15,140 bp                       | NC_016419  | [70]                         |
| <i>Pieris rapae</i>             |                                       | 15,157 bp                   | NC_015895                       | [71]       |                              |
| <i>Pieris melete</i>            |                                       | 15,140 bp                   | NC_010568                       | [72]       |                              |
| <i>Aporia crataegi</i>          |                                       | 15,140 bp                   | NC_018346                       | [73]       |                              |

**Table 2.** Cont.

| Subfamily      | Family      | Species                       | Length    | Acc.number | Reference |
|----------------|-------------|-------------------------------|-----------|------------|-----------|
|                | Lycaenidae  | <i>Coreana raphaelis</i>      | 15,314 bp | NC_007976  | [36]      |
|                |             | <i>Spindasis takanonis</i>    | 15,349 bp | NC_016018  | [74]      |
|                |             | <i>Protantigius superans</i>  | 15,248 bp | NC_016016  | [74]      |
| Yponomeutoidea | Lyonetiidae | <i>Leucoptera malifoliel</i>  | 15,646 bp | JN_790955  | [45]      |
| Hepialoidea    | Hepialidae  | <i>Thitarodes renzhiensis</i> | 16,173 bp | NC_018094  | [32]      |
|                |             | <i>Ahamus yunnanensis</i>     | 15,816 bp | NC_018095  | [32]      |

doi:10.1371/journal.pone.0072410.t002

whether the entire mitochondrial length of 15–20 kb or the genes of 37 and a control region with variable length.

Considering the insufficient and perplexity above, in the present work, we sequenced, annotated and compared an entire mitogenome of *A. emma* (Lepidoptera: Erebidae) which would be the first complete mitochondrial genome of Ctenuchinina. What is more, we compared it with other lepidopteran genomes available so as to get conservation and variance information of Ctenuchinina relative to others, and infer a phylogenetic relationship of Lepidoptera with the expectation for providing robust molecular evidence for taxonomic status of Ctenuchinina, and providing robust information on understanding the phylogenetic relationships of Noctuoidea and Erebidae.

## Materials and Methods

### Sample collection and DNA extraction

One ethanol-preserved adult of *A. emma* was collected from an organic apple orchard in Beijing, China, in July 2011. Since this orchard is one of field stations for studying insect biodiversity, where there are no endangered or protected species and we have been working for about six years, no specific permits were required for our collecting. Total genomic DNA was extracted from the single sample with the DNeasy Blood & Tissue kit. The detailed procedures were consistent with the manufacturer instructions.

### PCR amplification, cloning and sequencing

In order to get the whole genome, 14 pairs of primers were used for PCR amplification. The full list of primers is showed in Table 1. Figure 1 provides the coverage areas of PCR fragments. Eight pairs of universal primers [16] were used to amplify fragments 4, 5, 6, 10, 11, 12, 13 and 14. Primer combination LCO1490 with HCO2198 was used to amplify fragment 2. Primers for fragment 3 were modified from Simon *et al.* [16]. As for the other fragments 1, 7, 8 and 9, primers were designed with Primer Premier 5.0 software. Sequences of *Phalera flavescens* (Accession: NC016067), *Sesamia inferens* (Accession: NC015835), *Helicoverpa armigera* (Accession: NC014668), *Hyphantria cunea* (Accession: NC014058), *Lymantria dispar* (Accession: NC012893), and *Ochrogaster lunifer* (Accession: NC011128) were downloaded from GenBank and aligned using Clustal X [17] to obtain the conserved sequence, which can provide references for designing PCR primers. All primers were synthesized by Shanghai Sangon Biotechnology Co., Ltd. (Beijing, China).

PCR amplification conditions were as follows: an initial denaturation for 5 min at 95°C, followed by 35 cycles of denaturation for 30 s at 94°C, annealing for 30 s at 48–55°C (depending on primer combination), elongation for 1–3 min (depending on putative length of the fragments) at 68°C, and a

final extension step of 72°C for 10 min. All amplifications applied Takara LA Taq (Takara Co., Dalian, China) and performed on an Eppendorf Mastercycler and Mastercycler gradient.

The PCR products were resolved by electrophoresis in 1.0% agarose gel, purified using 3Spin PCR Product Purification Kit. All amplified products except *rrnS-nad2* were sequenced directly using upstream and downstream primers along both strands by ABI-377 automatic DNA sequencers. The *rrnS-nad2* fragment was sequenced after being ligated to the pEAST-T3 Cloning Vector (Beijing TransGen Biotech Co., Ltd., Beijing, China), and then sequenced by M13-F and M13-R primers and walking. Sequencing was performed using ABI BigDye 3.1 dye terminator sequencing technology and run on ABI 3730XL PRISM 3730 × 1 capillary sequencers. All sequencing procedures repeated at least three times.

### Sequence assembling and annotation

The overlapping PCR product sequences were checked and assembled using BioEdit [18] and DNASTar package DNASTar package (DNASTar Inc. Madison, USA). Rough locations of genes were initially identified via BLAST on NCBI and comparison with the other lepidopteran sequences available in GenBank.

The protein-coding sequences were translated into putative proteins on the basis of the Invertebrate Mitochondrial Genetic Code. Composition skew analysis was carried out according to formulas AT skew =  $[A-T]/[A+T]$  and GC skew =  $[G-C]/[G+C]$ , respectively [19]. The A+T content and Relative Synonymous Codon Usage (RSCU) were calculated by MEGA [20].

The tRNA genes were identified using the tRNAscan-SE Search [21] or predicted by sequence features of being capable of folding into the typical cloverleaf secondary structure with legitimate anticodon, and their secondary structures were drawn by RNAstructure program [22].

The secondary structure of *rrnS* and *rrnL* were inferred from models proposed for other insects. XRNA 1.2.0.b (<http://rna.ucsc.edu/rnacenter/xrna/xrna.html>) was used to draw the folding structure with the reference of the results of the CRW site [23] and other insect species. The tandem repeats of A+T-rich region were found via the Tandem Repeats Finder program, and the stem-loop structure was determined by the Mfold Web Server [24].

### Phylogenetic analysis

To construct a phylogenetic relationship of Lepidoptera, 54 complete or near-complete lepidopteran mitogenomes were downloaded from GenBank (Table 2). Besides, mitogenomes of *Bactrocera oleae* (NC\_005333) [25] and *Anopheles gambiae* (NC\_002084) [26] were downloaded and used as outgroups of the 55 taxa including the one we sequenced presently.

**Table 3.** Summary of mitogenome of *Amata emma*.

| Gene              | Direction | Form  | To    | Size | Inc | Anticodon | Start codon | Stop codon      |
|-------------------|-----------|-------|-------|------|-----|-----------|-------------|-----------------|
| <i>trnM</i>       | F         | 1     | 68    | 68   | 6   | CAT       | ---         | ---             |
| <i>trnI</i>       | F         | 75    | 140   | 66   | 0   | GAT       | ---         | ---             |
| <i>trnQ</i>       | R         | 141   | 209   | 69   | 51  | TTG       | ---         | ---             |
| <i>nad2</i>       | F         | 261   | 1274  | 1014 | 1   | ---       | ATT         | TAA             |
| <i>trnW</i>       | F         | 1276  | 1343  | 68   | -8  | TCA       | ---         | ---             |
| <i>trnC</i>       | R         | 1336  | 1398  | 63   | 6   | GCA       | ---         | ---             |
| <i>trnY</i>       | R         | 1405  | 1470  | 66   | 7   | GAT       | ---         | ---             |
| <i>cox1</i>       | F         | 1478  | 3011  | 1534 | 0   | ---       | CGA         | T- <i>trnL2</i> |
| <i>trnL2(UUR)</i> | F         | 3012  | 3079  | 68   | 0   | TAA       | ---         | ---             |
| <i>cox2</i>       | F         | 3080  | 3759  | 680  | 0   | ---       | ATG         | TA- <i>trnK</i> |
| <i>trnK</i>       | F         | 3760  | 3830  | 71   | -1  | CTT       | ---         | ---             |
| <i>trnD</i>       | F         | 3830  | 3909  | 78   | -10 | GTC       | ---         | ---             |
| <i>atp8</i>       | F         | 3900  | 4076  | 177  | -7  | ---       | ATT         | TAA             |
| <i>atp6</i>       | F         | 4070  | 4747  | 678  | 5   | ---       | ATG         | TAA             |
| <i>cox3</i>       | F         | 4753  | 5541  | 789  | 2   | ---       | ATG         | TAA             |
| <i>trnG</i>       | F         | 5544  | 5609  | 66   | 0   | TCC       | ---         | ---             |
| <i>nad3</i>       | F         | 5610  | 5963  | 354  | 3   | ---       | ATT         | TAA             |
| <i>trnA</i>       | F         | 5967  | 6032  | 66   | -1  | TGC       | ---         | ---             |
| <i>trnR</i>       | F         | 6032  | 6094  | 63   | 0   | TCG       | ---         | ---             |
| <i>trnN</i>       | F         | 6095  | 6160  | 66   | 4   | GTT       | ---         | ---             |
| <i>trnS1(AGN)</i> | F         | 6165  | 6230  | 66   | 0   | TCT       | ---         | ---             |
| <i>trnE</i>       | F         | 6231  | 6297  | 67   | 10  | TTC       | ---         | ---             |
| <i>trnF</i>       | R         | 6308  | 6373  | 66   | 0   | GAA       | ---         | ---             |
| <i>nad5</i>       | R         | 6374  | 8116  | 1743 | 0   | ---       | ATA         | TAA             |
| <i>trnH</i>       | R         | 8117  | 8182  | 66   | 0   | GTG       | ---         | ---             |
| <i>nad4</i>       | R         | 8183  | 9521  | 1339 | 0   | ---       | ATG         | T- <i>nad4L</i> |
| <i>nad4L</i>      | R         | 9522  | 9809  | 288  | 5   | ---       | ATG         | TAA             |
| <i>trnT</i>       | F         | 9815  | 9880  | 66   | 0   | TGT       | ---         | ---             |
| <i>trnP</i>       | R         | 9881  | 9946  | 66   | 8   | TGG       | ---         | ---             |
| <i>nad6</i>       | F         | 9955  | 10488 | 534  | 9   | ---       | ATA         | TAA             |
| <i>cob</i>        | F         | 10498 | 11652 | 1155 | 6   | ---       | ATG         | TAA             |
| <i>trnS2(UCN)</i> | F         | 11659 | 11725 | 67   | 20  | TAG       | ---         | ---             |
| <i>nad1</i>       | R         | 11746 | 12684 | 939  | 1   | ---       | ATG         | TAA             |
| <i>trnL1(CUN)</i> | R         | 12686 | 12753 | 68   | 0   | TAC       | ---         | ---             |
| <i>rrnL</i>       | R         | 12754 | 14124 | 1371 | 0   | ---       | ---         | ---             |
| <i>trnV</i>       | R         | 14125 | 14189 | 65   | 0   | ---       | ---         | ---             |
| <i>rrnS</i>       | R         | 14190 | 14981 | 792  | 0   | ---       | ---         | ---             |
| A+T-rich region   |           | 14982 | 15463 | 482  | 0   | ---       | ---         | ---             |

*Inc* = intergenic nucleotides.

doi:10.1371/journal.pone.0072410.t003

Two analytical approaches, Maximum Likelihood (ML) and Bayesian Inference (BI), were used to infer phylogenetic trees. Nucleotide sequences of each of the 13 PCGs were translated into amino acid sequences then aligned with default settings by MEGA, and these 13 resultant alignments were retranslated into nucleotide alignments by MEGA separately. These processed alignments were concatenated together by BioEdit and thus got a nucleotide matrix of 11,751 sites in length. Substitution model selection was conducted by MrModeltest2.3 (<http://www.abc.se/~nylander/mrmodeltest2/mrmodeltest2.html>) [27]. The Bayesian analysis was performed with MrBayes [28] for Bayesian while

ML analysis was performed by RAxML [29] for likelihood, and GTR + I + G model was the appropriate model of molecular evolution. The Bayesian analysis under the following conditions: 1,000,000 generations, 4 chains (1 cold chain and 3 hot chains) and a burn-in step for the first 10,000 generations. The confidence values of the BI tree were expressed as the Bayesian posterior probabilities in percentages. The ML analysis was performed using default parameters and the confidence values of the ML tree were evaluated via a bootstrap test with 1000 iteration.



**Table 4.** Composition and skewness of *A. emma* mitochondrial genome regions.

| nt %     | Whole mtDNA | Protein-coding sequence |                   |                   | rRNAs | tRNAs  | IGs    |          |           |
|----------|-------------|-------------------------|-------------------|-------------------|-------|--------|--------|----------|-----------|
|          |             | 1 <sup>st</sup> #       | 2 <sup>nd</sup> # | 3 <sup>rd</sup> # |       |        | IGs    | A+T-rich | Short-IGs |
| A%       | 38.7        | 36.8                    | 22.0              | 41.1              | 38.9  | 40.4   | 42.3   | 42.9     | 40.3      |
| T%       | 40.8        | 36.3                    | 48.3              | 48.8              | 44.8  | 40.2   | 49.7   | 49.8     | 49.3      |
| C%       | 13.0        | 10.5                    | 16.4              | 6.1               | 11.5  | 11.5   | 5.3    | 4.4      | 8.3       |
| G%       | 7.5         | 16.4                    | 13.2              | 4.0               | 4.7   | 7.9    | 2.7    | 2.9      | 2.1       |
| A+T%     | 79.5        | 73.1                    | 70.3              | 89.9              | 83.7  | 80.6   | 92     | 92.7     | 89.6      |
| C+G%     | 20.5        | 26.9                    | 29.6              | 10.1              | 16.2  | 19.4   | 8.0    | 7.3      | 10.4      |
| AT-Skew% | -0.026      | 0.007                   | -0.374            | -0.086            | -0.07 | 0.002  | -0.08  | -0.074   | -0.1      |
| GC-skew% | -0.268      | 0.219                   | -0.108            | -0.207            | -0.42 | -0.186 | -0.325 | -0.205   | -0.596    |

# = position.

IGs = non-coding intergenic spacer regions.

doi:10.1371/journal.pone.0072410.t004

|                            |                                 |                               |                               |
|----------------------------|---------------------------------|-------------------------------|-------------------------------|
| Bombycoidea                | <i>Bombyx mandarina</i>         | M P Q M M P I N W I F F L F F |                               |
|                            | <i>Antheraea pernyi</i>         | I P Q M M P I N W M F S F I F |                               |
|                            | <i>Saturnia boisduvalii</i>     | I P Q M M P I N W I F I F I F |                               |
|                            | <i>Manduca sexta</i>            | I P Q M M P I N W I M S L F F |                               |
| Geometroidea               | <i>Phthonandria atrilineata</i> | M P Q M M P I N W M L S F I L |                               |
|                            | Noctuoidea                      | <i>Phalera flavescens</i>     | I P Q M M P I N W I M S L F L |
|                            |                                 | <i>Ochrogaster lunifer</i>    | I P Q M M P I N W F I S L F F |
|                            |                                 | <i>Hyphantria cunea</i>       | M P Q M M P I N W L M S F F F |
|                            |                                 | <i>Lymantria dispar</i>       | I P Q M M P I N W L L S F L L |
|                            |                                 | <i>Amata emma</i>             | I P Q M M P I N W L M S F F F |
|                            |                                 | <i>Helicoverpa armigera</i>   | I P Q M M P I N W L I S F I F |
| <i>Sesamia inferens</i>    | I P Q M M P I N W L I S F F F   |                               |                               |
| Pyraloidea                 | <i>Ostrinia furnacalis</i>      | M P Q M M P I N W M L S L F F |                               |
|                            | <i>Cnaphalocrocis medinalis</i> | I P Q I N T N N W L I Y S F F |                               |
|                            | <i>Corcyra cephalonica</i>      | I P Q M M P I N W M I S F L F |                               |
| Tortricoidea               | <i>Adoxophyes honmai</i>        | I P Q M M P I N W M F S F F F |                               |
|                            | <i>Grapholita molesta</i>       | I P Q M M P I N W M I S F F F |                               |
|                            | <i>Spilonota lechriaspis</i>    | I P Q M M P I N W M I S F L F |                               |
| Papilionoidea              | <i>Teinopalpus aureus</i>       | I P Q M M P I N W L L S F F F |                               |
|                            | <i>Parnassius bremeri</i>       | M P Q M M P I N W L L S F F F |                               |
|                            | <i>Papilio maraho</i>           | I P Q M M P I N W I F F F V F |                               |
|                            | <i>Athyma sulpitia</i>          | I P Q M M P I N W I F S L I F |                               |
|                            | <i>Acraea issoria</i>           | I P Q M M P I N W L F Y F F F |                               |
|                            | <i>Apatura metis</i>            | I P Q M M P I N W I L S F F F |                               |
|                            | <i>Thitarodes renzhiensis</i>   | I P Q M M P I N W I F S L I F |                               |
|                            | <i>Pieris rapae</i>             | I P Q M M P I N W I L F F F F |                               |
|                            | <i>Pieris melete</i>            | I P Q M M P I N W I F F F F F |                               |
|                            | <i>Coreana raphaelis</i>        | I P Q M M P I N W I F S F F F |                               |
| <i>Spindasis takanonis</i> | I P Q M M P I N W I F F F S F   |                               |                               |
| Hepialoidea                | <i>Ahamus yunnanensis</i>       | M P Q M Y P I N W I L L F I L |                               |
|                            | <i>Fabriciana nerippe</i>       | M P Q M Y P I N W I M L F I F |                               |

**Figure 2.** The highly conserved sequence of 5' end of *atp8* gene among seven superfamilies in Lepidoptera.

doi:10.1371/journal.pone.0072410.g002

**A**

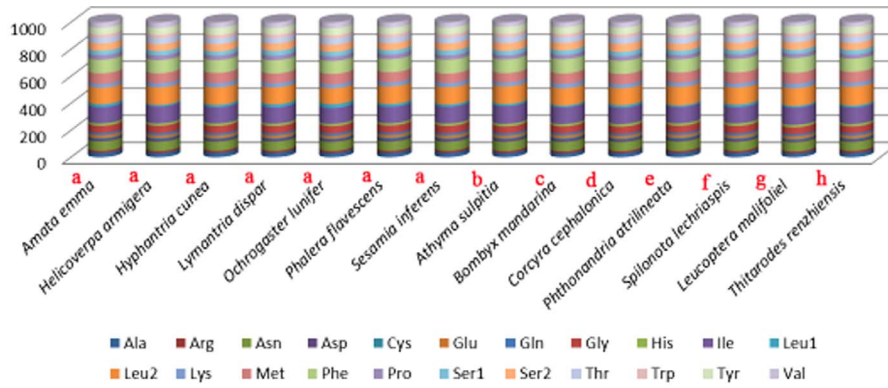

**B**

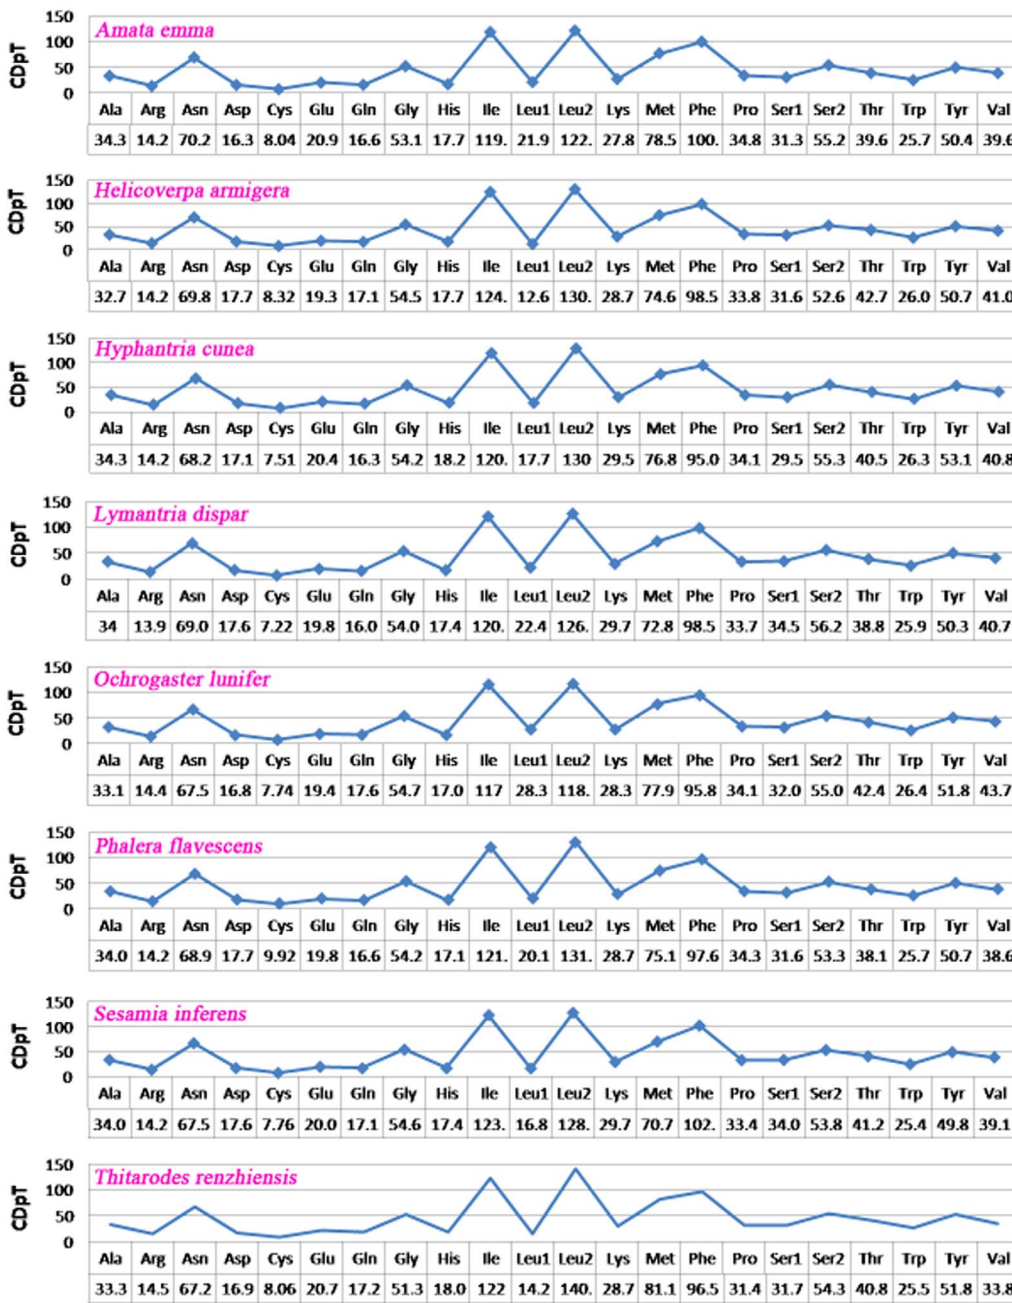

**Figure 3. Codon distribution.** A: Comparison of the codon usage of mitochondrial genome across eight superfamilies in Lepidoptera. The lowercase alphabet (a, b, c, d, e, f, g and h) above the species name represent the superfamily the species belong to (a:Noctuoidea, b: Papilionoidea, c: Bombycoidea, d: Pyraloidea, e: Geometroidea, f: Tortricoidea, g: Yponomeutoidea, h: Hepialoidea). B: Codon distribution in Noctuoidea. CDSPt, codons per thousand codons.  
doi:10.1371/journal.pone.0072410.g003

## Results and Discussion

### Genome structure and organization

The *A. emma* (GenBank accession : KC\_513737) mitogenome is a closed-circular molecule of 15,463 bp. It contains the typical set of 37 genes (13 PCGs, 22 tRNAs and 2 rRNAs) as in most animal mtDNA [1]. Gene order and orientation of *A. emma* are identical to the other ditrysian insects to date, and the locations of *tmM* gene follow the ditrysian type *tmM-tmI-tmQ* [30,30,31] which is different from non-ditrysian groups in Lepidoptera [32]. Twenty-three genes are coded on the majority strand while the rest are coded on the minority strand (Table 3 and Figure 1).

The genome composition (A: 37.8%, T: 40.8%, C: 13% and 7.5%) of the major strand shows highly A+T biased which accounts for 79.5%, and exhibits negative AT-skew ( $-0.026$ ) and GC-skew ( $-0.268$ ). As for the other lepidopteran mitochondrion genomes previously sequenced, the value of AT-skew ( $-0.026$ ) is in the range from  $-0.06$  (*Bombyx mori*) to  $0.05$  (*Athyma sulphitia*) while the GC-skew ( $-0.268$ ) is in the range from  $-0.32$  (*Ochrogaster lunifer*) to  $-0.16$  (*C. raphaelis*). The full list of composition and skewness of *A. emma* is shown in Table 4.

### Protein-coding genes

Among 13 protein-coding genes, nine (*nad2*, *cox1*, *cox2*, *atp8*, *atp6*, *cox3*, *nad3*, *nad6* and *cob*) are coded on the majority strand while the rest (*nad5*, *nad4*, *nad4L*, *nad1*) are coded on the minority strand. The initial codons are the canonical putative start codons ATN (ATA for *nad5*, *nad6*; ATT for *nad2*, *atp8*, *nad3*; ATG for *cox2*, *atp6*, *cox3*, *nad4*, *nad4L*, *cob*, *nad1*), with the exception of *cox1* gene which uses CGA instead. A recent study has used expressed sequence tag to explain that *cox1* may start with CGA [33]. Though controversy exists for the start codon of *cox1*, the present study shows the use of CGA. Ten genes share complete termination codon TAA, and three genes use incomplete stop codons (a single T for *cox1* and *nad4*, TA for *cox2*). The non-canonical stop codons will be corrected via post-transcriptional polyadenylation [34]. The *atp8* and the *atp6* have a 7 bp overlap, which is common to all Lepidoptera mitogenomes known to date [3,32]. The 5' end of *atp8* gene is highly conserved in Lepidoptera-IPQMMINW or MPQMMINW, and *A. emma* also presents this characteristic with no exception (Figure 2).

The A+T content of three codon positions of the PCGs was calculated (the stop codons were excluded from the analysis) and is showed in Table 4. The third position has a relatively high A +T content (89.9%), while the first and the second positions have 73.1% and 70.3%, respectively. In addition, both the second and the third position have negative AT-skew and GC-skew.

Comparison results of the codon usage of mitochondrial genomes across eight superfamilies of Lepidoptera are showed in Figure 3A. Fourteen species in Lepidoptera (seven belonging to Noctuoidea, the rest belonging to Bombycoidea, Geometroidea, Pyraloidea, Tortricoidea, Papilionoidea, Yponomeutoidea and Hepialoidea, respectively) (Figure 3A) were examined and the results show that *Leu2*, *Ile*, *Phe*, *Met*, and *Asn* are the five most frequent amino acids. *Leu2*, as a hydrophobic amino acid, has the highest usage rate, which may relate to the function of chondriosome of encoding many transmembrane proteins. The rarest used codon family is *Cys*. Codon distributions of seven

species in Noctuoidea are consistency and each amino acid has equal content in different species (Figure 3B).

RSCU for Noctuoidea is present in Figure 4. The usage of both two-fold and four-fold degenerate codon is biased to use the

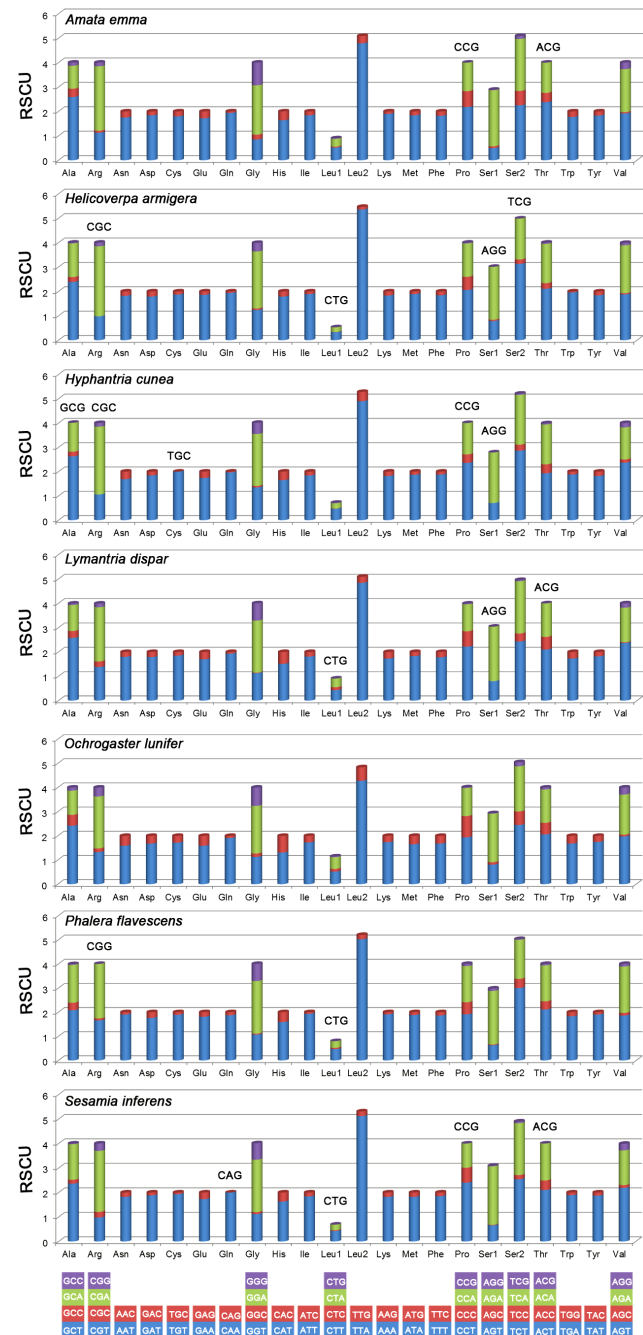

**Figure 4. Relative Synonymous Codon Usage (RSCU) in Noctuoidea.** Codon families are provided on the X axis. The codon above the bar indicate the one is not present in the genome.  
doi:10.1371/journal.pone.0072410.g004



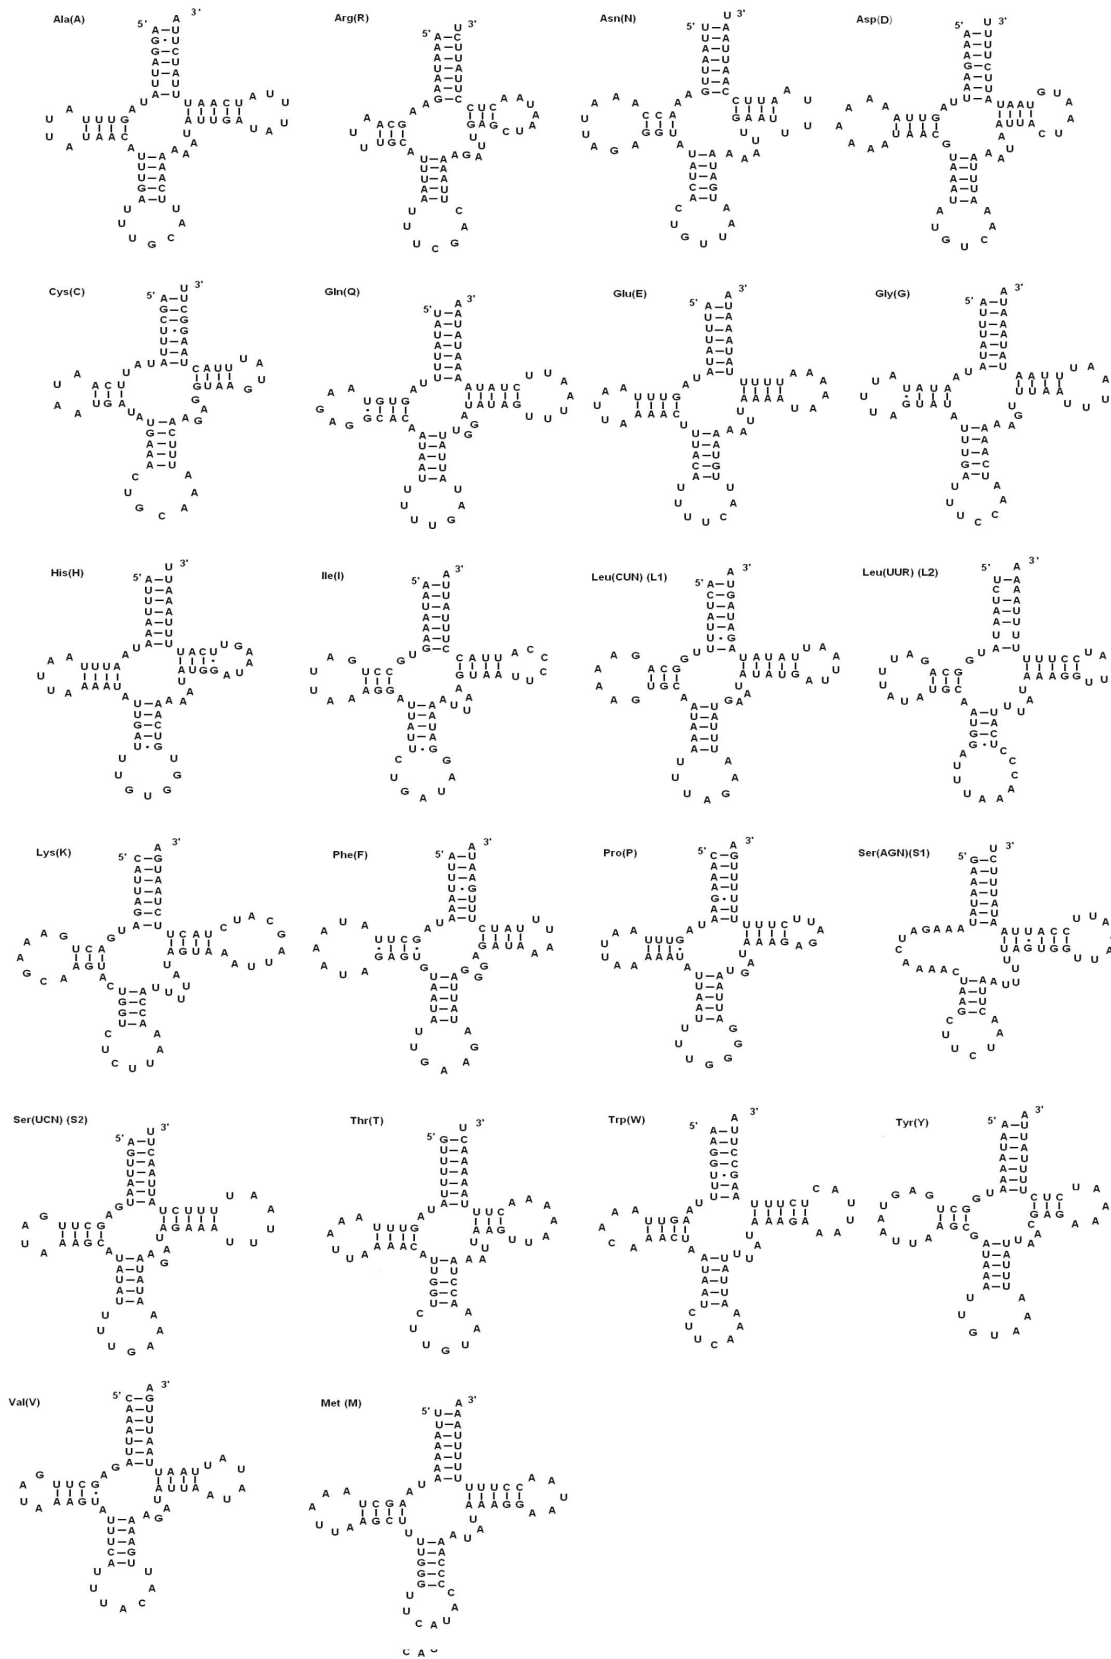

**Figure 5. Predicted secondary structures for 22 tRNA genes of *A.emma* mitogenome.** The tRNAs are labeled with the abbreviations of their corresponding amino acids. Dashes (–) indicate Watson-Crick base pairing and centered dots (·) indicate G-C base pairing. doi:10.1371/journal.pone.0072410.g005





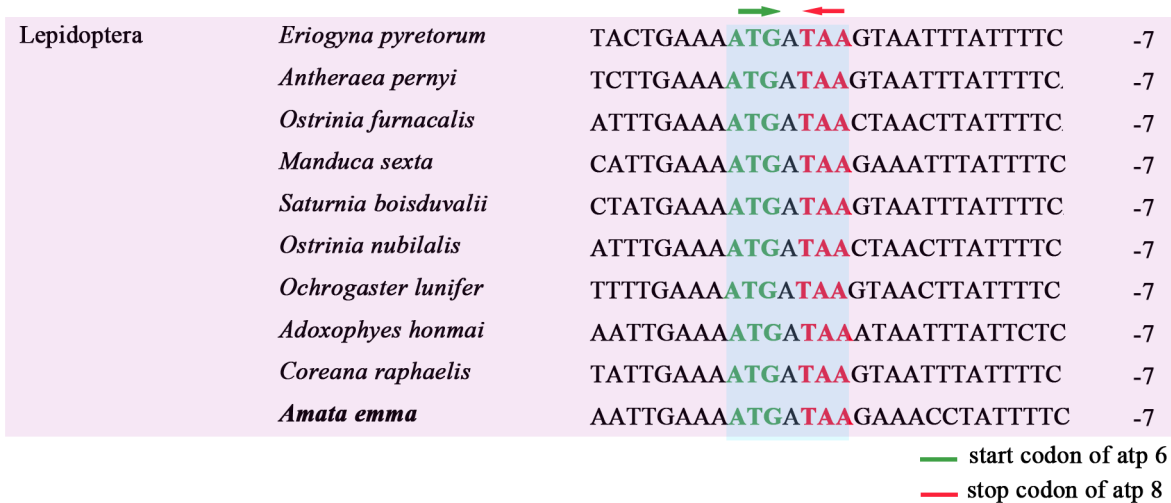

**Figure 8. Alignment of overlapping region between *atp8* and *atp6* across Lepidoptera and other insects.** The numbers on the right refer to intergenic nucleotides. doi:10.1371/journal.pone.0072410.g008

**Conclusion**

In this study, the mtgenome of *Amata emme* was sequenced, analyzed and compared with other lepidopteran insects, which would be the first whole mtgenome record of Ctenuchinina. The mtgenome shares many features with those of most Lepidopteran insects reported previously, just with some subtle differences in

A+T region. In addition, we clarified the taxonomic status of Ctenuchinina using model-based phylogenetic inference and thus provide evidence for biological protection based on molecular markers.

The phylogenetic relationships based on nucleotide sequences of 13 PCGs using Bayesian inference and maximum likelihood methods provided a well-supported a broader outline of Lepidop-

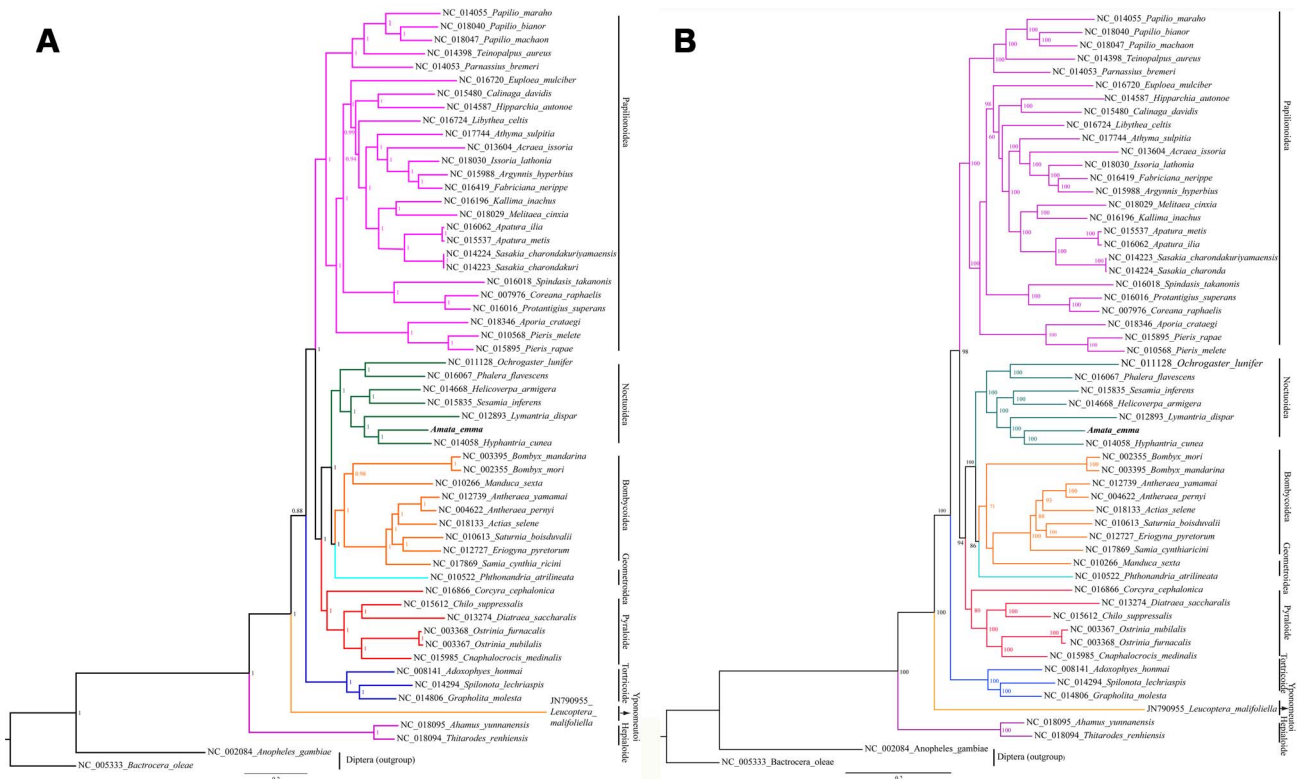

**Figure 9. Inferred phylogenetic relationship among Lepidoptera based on amino acid sequence of mitochondrial 13 PCGs using Bayesian Inference (BI) (A) and maximum likelihood (ML) (B).** Number at each node show posterior probabilities (A) and bootstrap percentages (B), respectively. *Bactrocera oleae* (NC\_005333) and *Anopheles gambiae* (NC\_002084) were used as outgroups. doi:10.1371/journal.pone.0072410.g009



tera and which agree with the traditional morphological classification and recently working, but with a much higher support. In this study, despite we have not performed much process on data matrix such as partition by codes, the result really provide a robust phylogenetic framework, which may imply that 13PCGs which have the function of express protein determining biological trait can be used as materials for phylogenetic inference just under a simple organization. However, this implication deeply needs more studies to verify whether it is universally applicable or not.

## References

- Boore JL (1999) Animal mitochondrial genomes. *Nucleic Acids Research* 27: 1767–1780.
- Taanman JW (1999). The mitochondrial genome: structure, transcription, translation and replication. *Biochim Biophys Acta* 1410,103–123.
- Salvato P, Simonato M, Battisti A, Negrisolo E (2008) The complete mitochondrial genome of the bag-shelter moth *Ochrogaster lunifer* (Lepidoptera, Notodontidae). *BMC genomics* 9: 331.
- Reyes A, Gissi C, Pesole G, Saccone C (1998) Asymmetrical directional mutation pressure in the mitochondrial genome of mammals. *Molecular Biology and Evolution* 15: 957–966.
- Ingman M, Kaessmann H, Paabo S, Gyllensten U, Ingman M, et al. (2000) Mitochondrial genome variation and the origin of modern humans. *Nature* 408: 708–712.
- Kristensen NP, Scoble M, Karsholt O (2007) Lepidoptera phylogeny and systematics: the state of inventorying moth and butterfly diversity. *Zootaxa* 1668: 699–747.
- van Nieukerken E, Kaila L, Kitching I, Kristensen N, Lees D, et al. (2011) Animal biodiversity: An outline of higher-level classification and survey of taxonomic richness. *Zootaxa* 3148: 1–237.
- Speidel W, Naumann C (2004) A survey of family - group names in noctuid moths (Insecta: Lepidoptera). *Systematics and Biodiversity* 2: 191–221.
- Lafontaine JD, Fibiger M (2006) Revised higher classification of the Noctuoidea (Lepidoptera). *The Canadian Entomologist* 138: 610–635.
- Zahiri R, Kitching IJ, Lafontaine JD, Mutanen M, Kaila L, et al. (2011) A new molecular phylogeny offers hope for a stable family level classification of the Noctuoidea (Lepidoptera). *Zoologica Scripta* 40: 158–173.
- Zahiri R, Holloway JD, Kitching IJ, Lafontaine D, Mutanen M, et al. (2012) Molecular phylogenetics of Erebiidae (Lepidoptera Noctuoidea). *Systematic Entomology* 37: 102–124.
- Kumar V, Rajadurai S, Babu AM, Kariappa BK (2003) Eggshell Fine Structure of *Amata passalis* F. (Lepidoptera: Amatidae), A Pest of Mulberry. *International Journal of Tropical Insect Science* 23: 325–330.
- Hudon M, Perron JP (1970) First record of cisseps fulvicollis (Lepidoptera: Amatidae) as an economic destructive insect on grain corn Canada. *The Canadian Entomologist* 102: 1052–1054.
- Wink M, Von Nickisch-Rosenegk E (1997) Sequence Data of Mitochondrial 16S rDNA of Arctiidae and Nymphalidae: Evidence for a Convergent Evolution of Pyrrolizidine Alkaloid and Cardiac Glycoside Sequestration. *Journal of Chemical Ecology* 23: 1549–1568.
- Schneider D, Legal L, Dierl W, Wink M (1999) Androconial hairbrushes of the *Syntomis (Amata) phegea* (L.) group (Lepidoptera, Ctenuchinae): A synapomorphic character supported by sequence data of the mitochondrial 16S rRNA gene. *Zeitschrift Für Naturforschung* 54: 1119–1139.
- Simon C, Frati F, Beckenbach A, Crespi B, Liu H, et al. (1994) Evolution, weighting, and phylogenetic utility of mitochondrial gene sequences and a compilation of conserved polymerase chain reaction primers. *Ann Ent Soc Am* 87: 651–701.
- Larkin M, Blackshields G, Brown N, Chenna R, McGettigan P, et al. (2007) Clustal W and Clustal X version 2.0. *Bioinformatics* 23: 2947–2948.
- Hall TA (1999) BioEdit: a user-friendly biological sequence alignment editor and analysis program for Windows 95/98/NT. *Nucleic Acids Symposium Series* 41:95–98.
- Perna NT, Kocher TD (1995) Patterns of nucleotide composition at fourfold degenerate sites of animal mitochondrial genomes. *Journal of Molecular Evolution* 41: 353–358.
- Tamura K, Dudley J, Nei M, Kumar S (2007) MEGA4: molecular evolutionary genetics analysis (MEGA) software version 4.0. *Molecular Biology and Evolution* 24: 1596–1599.
- Lowe TM, Eddy SR (1997) tRNAscan-SE: a program for improved detection of transfer RNA genes in genomic sequence. *Nucleic Acids Research* 25: 0955–0964.
- Reuter JS, Mathews DH (2010) RNAstructure: software for RNA secondary structure prediction and analysis. *BMC Bioinformatics* 11: 129.
- Cannone JJ, Subramanian S, Schnare MN, Collett JR, D'Souza LM, et al. (2002) The comparative RNA web (CRW) site: an online database of comparative sequence and structure information for ribosomal, intron, and other RNAs. *BMC Bioinformatics* 3: 2.
- Zuker M (2003) Mfold web server for nucleic acid folding and hybridization prediction. *Nucleic Acids Research* 31: 3406–3415.
- Nardi F, Carapelli A, Dallai R, Frati F (2003) The mitochondrial genome of the olive fly *Bactrocera oleae*: two haplotypes from distant geographical locations. *Insect Molecular Biology* 12: 605–611.
- Beard CB, Hamm DM, Collins FH (1993) The mitochondrial genome of the mosquito *Anopheles gambiae*: DNA sequence, genome organization, and comparisons with mitochondrial sequences of other insects. *Insect Molecular Biology* 2: 103–124.
- Posada D, Crandall KA (1998) MODELTEST: Testing the model of DNA substitution. *Bioinformatics* 14:817–818.
- Huelsenbeck JP, Ronquist F (2001) MRBAYES: Bayesian inference of phylogenetic trees. *Bioinformatics* 17: 754–755.
- Stamatakis A (2006) RAXML-VI-HPC: maximum likelihood-based phylogenetic analyses with thousands of taxa and mixed models. *Bioinformatics* 22: 2688–2690.
- Negrisolo E, Babbucci M, Patarnello T (2011) The mitochondrial genome of the ascalaphid owlfly *Libelloides macaronius* and comparative evolutionary mitochondrial genomics of neuropterid insects. *BMC genomics* 12: 221.
- Cameron SL, Whiting MF (2008) The complete mitochondrial genome of the tobacco hornworm, *Manduca sexta*, (Insecta: Lepidoptera: Sphingidae), and an examination of mitochondrial gene variability within butterflies and moths. *Gene* 408: 112–123.
- Cao YQ, Ma C, Chen JY, Yang DR (2012) The complete mitochondrial genomes of two ghost moths, *Thitarodes renzhienis* and *Thitarodes yunnanensis*: the ancestral gene arrangement in Lepidoptera. *BMC Genomics* 13: 276.
- Margam VM, Coates BS, Hellmich RL, Agunbiade T, Scufferheld MJ, et al. (2011) Mitochondrial genome sequence and expression profiling for the legume pod borer *Maruca vitrata* (Lepidoptera: Crambidae). *PLoS one* 6: e16444.
- Ojala D, Montoya J, Attardi G (1981) tRNA punctuation model of RNA processing in human mitochondria. *Nature* 290: 470–474.
- Chai HN, Du YZ, Zhai BP (2012) Characterization of the complete mitochondrial genomes of *Cnaphalocrocis medinalis* and *Chilo suppressalis* (Lepidoptera: Pyralidae). *International Journal of Biological Sciences* 8: 561.
- Kim I, Lee E, Seol K, Yun E, Lee Y, et al. (2006) The mitochondrial genome of the Korean hairstreak, *Coreana raphaelis* (Lepidoptera: Lycaenidae). *Insect Molecular Biology* 15: 217–225.
- Nelson LA, Lambkin CL, Batterham P, Wallman GF, Dowton M, et al. (2012) Beyond barcoding: A mitochondrial genomics approach to molecular phylogenetics and diagnostics of blowflies (Diptera: Calliphoridae). *Gene* 51:131–142.
- Junqueira ACM, Lessinger AC, Torres TT, da Silva FR, Vettore AL, et al. (2004) The mitochondrial genome of the blowfly *Chrysomya chloropyga* (Diptera: Calliphoridae). *Gene* 339: 7–15.
- Lee ES, Shin KS, Kim MS, Park H, Cho S, et al. (2006) The mitochondrial genome of the smaller tea tortrix *Adoxophyes honmai* (Lepidoptera: Tortricidae). *Gene* 373: 52–57.
- Lavrov DV, Brown WM, Boore JL (2000) A novel type of RNA editing occurs in the mitochondrial tRNAs of the centipede *Lithobius forficatus*. *Proceedings of the National Academy of Sciences* 97: 13738.
- Zhao JL, Zhang YY, Luo AR, Jiang GF, Cameron SL, et al. (2011) The complete mitochondrial genome of *Spilonota lechriaspis* Meyrick (Lepidoptera: Tortricidae). *Molecular Biology Reports* 38: 3757–3764.
- Liao F, Wang L, Wu S, Li YP, Zhao L, et al. (2010) The complete mitochondrial genome of the fall webworm, *Hyphantria cunea* (Lepidoptera: Arctiidae). *International Journal of Biological Sciences* 6: 172.
- Yin J, Hong GY, Wang AM, Cao YZ, Wei ZJ (2010) Mitochondrial genome of the cotton bollworm *Helicoverpa armigera* (Lepidoptera: Noctuidae) and comparison with other Lepidopterans. *Mitochondrial DNA* 21: 160–169.
- Mutanen M, Wahlberg N and Kaila L (2010) Comprehensive gene and taxon coverage elucidates radiation patterns in moths and butterflies. *Proceedings of the Royal Society B: Biological Sciences* 277: 2839–2848.
- Wu YP, Zhao JL, Su TJ, Li J, Yu F, et al. (2012) The Complete Mitochondrial Genome of *Leucophaea malifoliella* Costa (Lepidoptera: Lyonetiidae). *DNA and Cell Biology* 31(10): 1508–1522.
- Yukuhiro K, Sezutsu H, Itoh M, Shimizu K, Banno Y (2002) Significant levels of sequence divergence and gene rearrangements have occurred between the mitochondrial genomes of the wild mulberry silkworm, *Bombyx mandarina*, and its

## Acknowledgments

We would like to thank Fu-Qiang Chen and Fang Yu (Institute of Zoology, Chinese Academy of Sciences, Beijing) for their kind supports.

## Author Contributions

Conceived and designed the experiments: CDZ CSW. Performed the experiments: HFL TJS. Analyzed the data: HFL ARL. Contributed reagents/materials/analysis tools: CDZ. Wrote the paper: HFL TJS ARL CDZ CSW.

- close relative, the domesticated silkmoth, *Bombyx mori*. Molecular Biology and Evolution 19: 1385–1389.
47. Liu Y, Li Y, Pan M, Dai F, Zhu X, et al. (2008) The complete mitochondrial genome of the Chinese oak silkmoth, *Antheraea pernyi* (Lepidoptera: Saturniidae). Acta biochimica et biophysica Sinica 40: 693–703.
  48. Kim SR, Kim MI, Hong MY, Kim KY, Kang PD, et al. (2009) The complete mitogenome sequence of the Japanese oak silkmoth, *Antheraea yamamai* (Lepidoptera: Saturniidae). Molecular biology reports 36: 1871–1880.
  49. Kim JS, Park JS, Kim MJ, Kang PD, Kim SG, et al. (2012) Complete nucleotide sequence and organization of the mitochondrial genome of eri-silkworm, *Samia cynthia ricini* (Lepidoptera: Saturniidae). Journal of Asia-Pacific Entomology 15: 162–173.
  50. Hong MY, Lee EM, Jo YH, Park HC, Kim SR, et al. (2008) Complete nucleotide sequence and organization of the mitogenome of the silk moth *Caligula boisduvalii* (Lepidoptera: Saturniidae) and comparison with other lepidopteran insects. Gene 413: 49–57.
  51. Jiang ST, Hong GY, Yu M, Li N, Yang Y, et al. (2009) Characterization of the complete mitochondrial genome of the giant silkworm moth, *Eriogyna pyretorum* (Lepidoptera: Saturniidae). International journal of biological sciences 5: 351.
  52. Liu QN, Zhu BJ, Dai LS, Wei GQ, Liu CL (2012) The complete mitochondrial genome of the wild silkworm moth, *Actias selene*. Gene 505: 291–299.
  53. Yang L, Wei ZJ, Hong GY, Jiang ST, Wen LP (2009) The complete nucleotide sequence of the mitochondrial genome of *Phthonandria atrilineata* (Lepidoptera: Geometridae). Molecular biology reports 36: 1441–1449.
  54. Hao J (2012) Complete sequence of the mitochondrial genome of the Japanese buff-tip moth, *Phalera flavescens* (Lepidoptera: Notodontidae). Genetics and Molecular Research 11: 4213–4225.
  55. Yajun Z, Guoliang Z, Rui F, Jun Y, Jianping Y (2010) The complete sequence determination and analysis of *Lymantria dispar* (Lepidoptera: Lymantriidae) mitochondrial genome. Plant Quarantine 4: 005.
  56. Coates BS, Sumerford DV, Hellmich RL, Lewis LC (2005) Partial mitochondrial genome sequences of *Ostrinia nubilalis* and *Ostrinia furnicalis*. International journal of biological sciences 1: 13.
  57. Li W, Zhang X, Fan Z, Yue B, Huang F, et al. (2011) Structural characteristics and phylogenetic analysis of the mitochondrial genome of the sugarcane borer, *Diatraea saccharalis* (Lepidoptera: Crambidae). DNA and Cell Biology 30: 3–8.
  58. Son Y, Kim Y (2011) The complete mitochondrial genome of *Grapholita molesta* (Lepidoptera: Tortricidae). Annals of the Entomological Society of America 104: 788–799.
  59. Qin F, Jiang GF, Zhou SY (2012) Complete mitochondrial genome of the *Teinopalpus aureus guangxiensis* (Lepidoptera: Papilionidae) and related phylogenetic analyses. Mitochondrial DNA 23: 123–125.
  60. Kim MI, Baek JY, Kim MJ, Jeong HC, Kim KG, et al. (2009) Complete nucleotide sequence and organization of the mitogenome of the red-spotted apollo butterfly, *Parnassius bremeri* (Lepidoptera: Papilionidae) and comparison with other lepidopteran insects. Molecules and cells 28: 347–363.
  61. Yang Q (2013) Complete Mitogenomes of *Euploea mulciber* (Nymphalidae: Danaeinae) and *Libythea celtis* (Nymphalidae: Libytheinae) and Their Phylogenetic Implications. ISRN Genomics 2013.
  62. Qin XM, Guan QX, Zeng DL, Qin F, Li HM (2012) Complete mitochondrial genome of *Kallima inachus* (Lepidoptera: Nymphalidae: Nymphalinae): Comparison of *K. inachus* and *Argynnis hyperbius*. Mitochondrial DNA 23: 318–320.
  63. Hu J, Zhang D, Hao J, Huang D, Cameron S, et al. (2010) The complete mitochondrial genome of the yellow coaster, *Acraea issoria* (Lepidoptera: Nymphalidae: Heliconiinae: Acraeini): sequence, gene organization and a unique tRNA translocation event. Molecular biology reports 37: 3431–3438.
  64. Wang XC, Sun XY, Sun QQ, Zhang DX, Hu J, et al. (2011) Complete mitochondrial genome of the laced fritillary *Argyreus hyperbius* (Lepidoptera: Nymphalidae). Zool Res 32: 465–475.
  65. Chen M, Tian LL, Shi QH, Cao TW, Hao JS (2012) Complete mitogenome of the Lesser Purple Emperor *Apatura ilia* (Lepidoptera: Nymphalidae: Apaturinae) and comparison with other nymphalid butterflies. Zoological Research 33: 191–201.
  66. Kim MJ, Wan X, Kim K, Hwang JS, Kim I (2010) Complete nucleotide sequence and organization of the mitogenome of endangered *Eumenis autonoe* (Lepidoptera: Nymphalidae). African Journal of Biotechnology 9.
  67. Zhang M, Nie X, Cao T, Wang J, Li T, et al. (2012) The complete mitochondrial genome of the butterfly *Apatura metis* (Lepidoptera: Nymphalidae). Molecular biology reports 39: 6529–6536.
  68. Tian LL, Sun XY, Chen M, Gai YH, Hao JS, et al. (2012) Complete mitochondrial genome of the Five-dot Sergeant *Parathyma sulphita* (Nymphalidae: Limenitidinae) and its phylogenetic implications. Zoological Research 33: 133–143.
  69. Jing X, Jing H, GuoPing Z, ChaoDong Z, JiaSheng H (2011) Sequencing and analysis of the complete mitochondrial genome of *Calinaga davidis* Oberthür (Lepidoptera: Nymphalidae). Acta Entomologica Sinica 54: 555–565.
  70. Kim MJ, Jeong HC, Kim SR, Kim I (2011) Complete mitochondrial genome of the nerippe fritillary butterfly, *Argynnis nerippe* (Lepidoptera: Nymphalidae). Mitochondrial DNA 22: 86–88.
  71. Mao Z, Hao J, Zhu G, Hu J, Si M, et al. (2010) Sequencing and analysis of the complete mitochondrial genome of *Pieris rapae* Linnaeus (Lepidoptera: Pieridae). Acta Entomol Sin 53: 1295–1304.
  72. Hong G, Jiang S, Yu M, Yang Y, Li F, et al. (2009) The complete nucleotide sequence of the mitochondrial genome of the cabbage butterfly, *Artogeia melete* (Lepidoptera: Pieridae). Acta biochimica et biophysica Sinica 41: 446–455.
  73. Park JS, Cho Y, Kim MJ, Nam SH, Kim I (2012) Description of complete mitochondrial genome of the black-veined white, *Aporia crataegi* (Lepidoptera: Papilionoidea), and comparison to papilionoid species. Journal of Asia-Pacific Entomology 15: 331–341.
  74. Kim MJ, Kang AR, Jeong HC, Kim KG, Kim I (2011) Reconstructing intraordinal relationships in Lepidoptera using mitochondrial genome data with the description of two newly sequenced lycanids, *Spindasis takanonis* and *Protantigius superans* (Lepidoptera: Lycaenidae). Molecular phylogenetics and evolution 61: 436–445.
